# Supplementary material for: Hydrodeoxygenation of bio-oil model compounds over Ni- and Pt-catalysts supported on hydrophobized halloysite nanotubes
Source: Royal Society of Chemistry journal article supplement (doi:10.1039/d4se00518j), 2024-01-01
Supplement: d4se00518j1.pdf [file d4se00518j1.pdf]

## SUPPORTING INFORMATION FOR

### Hydrodeoxygenation of bio-oil model compounds over Ni- and Pt-catalysts supported on hydrophobized halloysite nanotubes

Gleb Zasyalov<sup>1</sup>, Vladimir Klimovsky<sup>1</sup>, Egor Abramov<sup>1</sup>, Anna Vutolkina<sup>1,2</sup>,  
Ekaterina Mustakimova<sup>2</sup>, Sergey Verevkin<sup>3</sup>, Valentin Stytsenko<sup>1</sup>, Aleksandr Glotov<sup>1\*</sup>

<sup>1</sup>Gubkin Russian State University of Oil and Gas, 119991, Russia, Moscow, 65 Leninsky Prospekt;

<sup>2</sup>Lomonosov Moscow State University, 119991, GSP-1, Russia, Moscow, 1-3 Leninskiye Gory;

<sup>3</sup>Competence Centre CALOR of Faculty of Interdisciplinary Research at University of Rostock, 18059, Germany, Rostock, Universitätsplatz 1.

\*corresponding author: Aleksandr Glotov, glotov.a@gubkin.ru

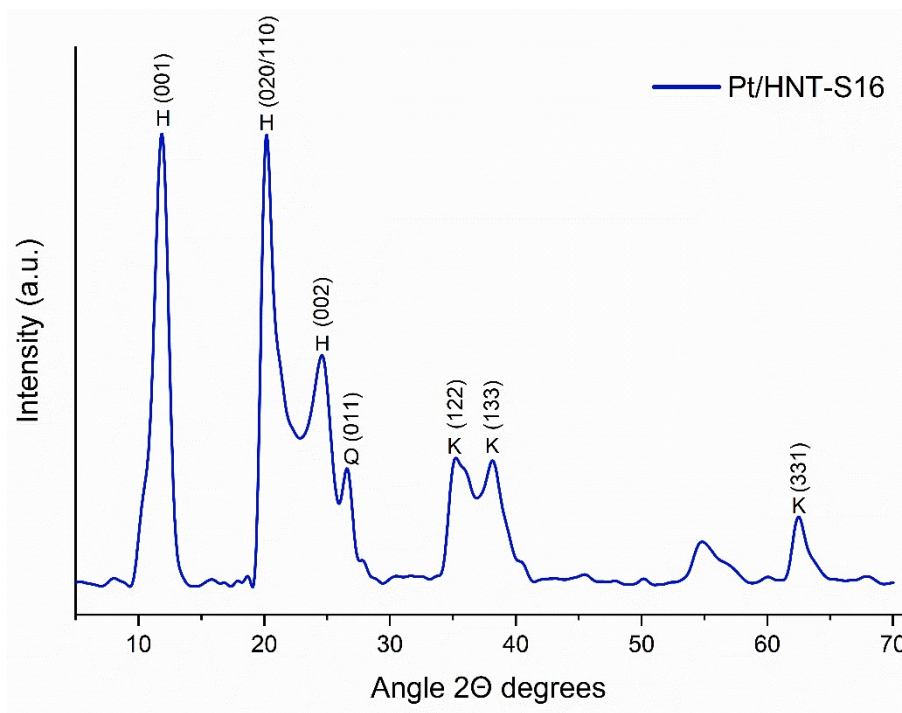

**Fig. S1.** XRD patterns of the Pt/HNT-S16 sample

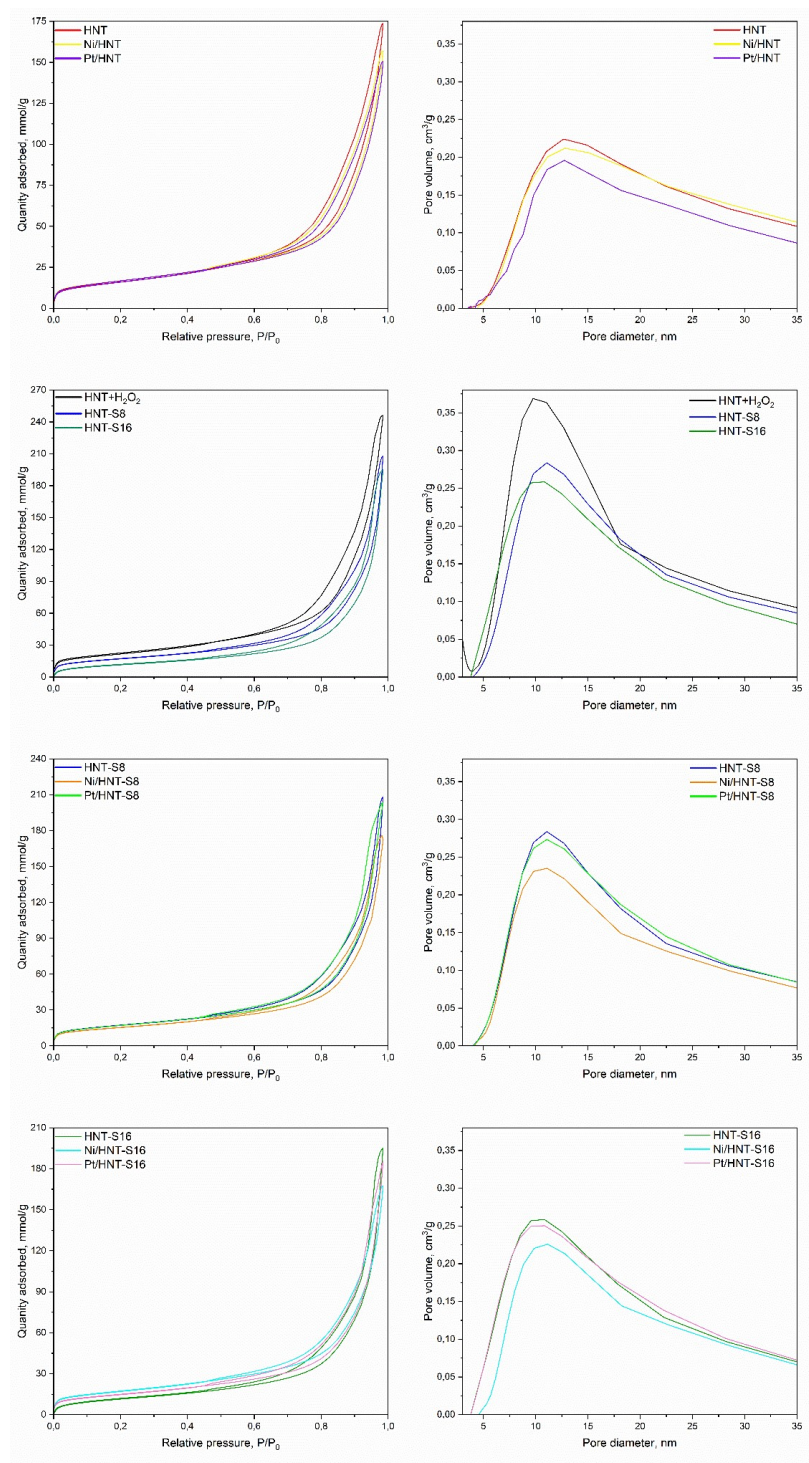

**Fig. S2.** Adsorption–desorption isotherms and pore size distribution for supports and catalysts

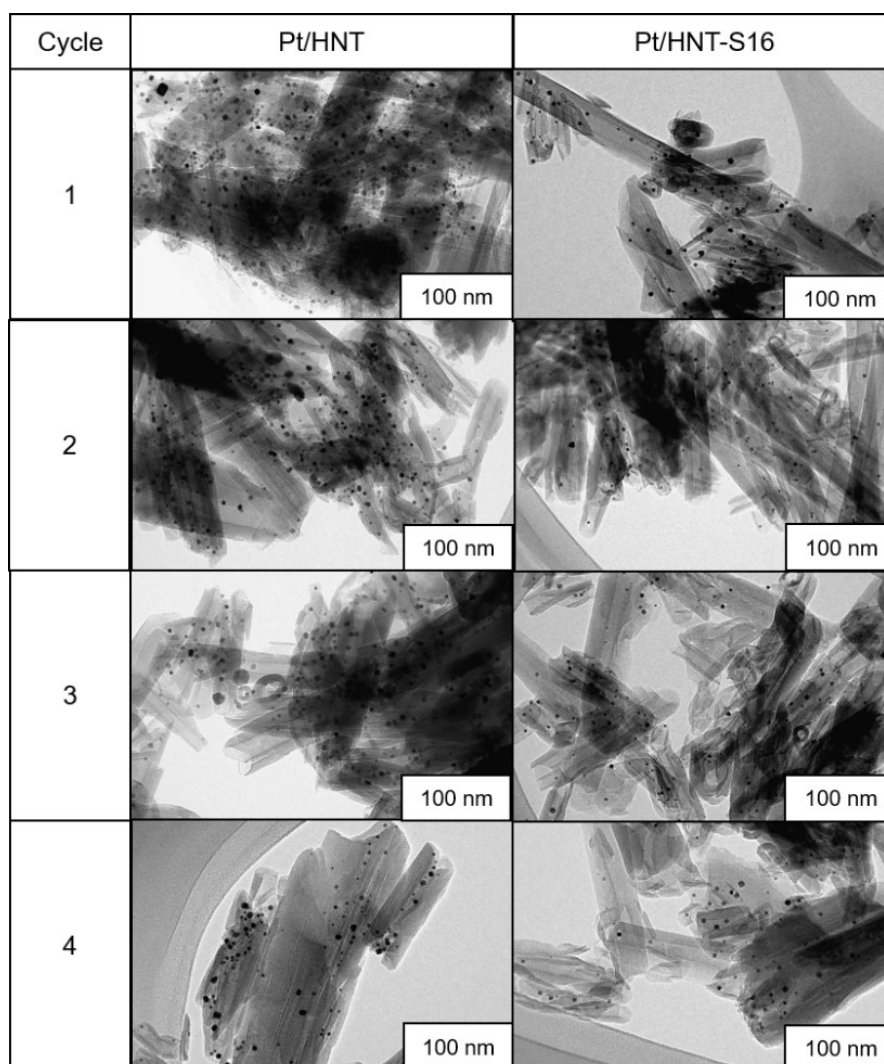

**Fig. S3.** TEM images for Pt/HNT and Pt/HNT-S16 catalysts under the recirculation mode of the HDO anisole-water mixture

**Table S1.** The composition of Ni and Pt catalysts and the quantitative XPS analysis of the Al 2p+Pt 4f<sub>7/2</sub>, Pt 4d<sub>5/2</sub> and Ni 2p<sub>3/2</sub> core levels

| Sample                        | Ni/HNT | Ni/HNT-S <sub>16</sub> | Pt/HNT | Pt/HNT-S <sub>16</sub> |
|-------------------------------|--------|------------------------|--------|------------------------|
| Surface concentration (at. %) |        |                        |        |                        |
| C                             | 5.3    | 7.1                    | 4.2    | 6.1                    |
| O                             | 55.1   | 54.3                   | 55.4   | 53.7                   |
| Al                            | 16.1   | 15.8                   | 17.8   | 18.4                   |
| Si                            | 23.2   | 22.5                   | 22.6   | 21.6                   |
| Ni                            | 0.3    | 0.4                    | n.a.   | n.a.                   |
| Pt                            | n.a.   | n.a.                   | 0.1    | 0.1                    |
| Component ratios              |        |                        |        |                        |
| Si/Al                         | 1.4    | 1.4                    | 1.3    | 1.2                    |
| Ni(Pt)/Al                     | 0.02   | 0.03                   | 0.006  | 0.005                  |
| Ni(Pt)/Si                     | 0.01   | 0.02                   | 0.004  | 0.005                  |
| Ni(Pt)/(Si+Al)                | 0.01   | 0.01                   | 0.002  | 0.003                  |

| Characteristics of active phase species |                    |                 |                        |                 |
|-----------------------------------------|--------------------|-----------------|------------------------|-----------------|
| Sample                                  | Ni/HNT             |                 | Ni/HNT-S <sub>16</sub> |                 |
| Si 2 <i>p</i>                           | Binding Energy, eV | Content, rel. % | Binding Energy, eV     | Content, rel. % |
| SiO <sub>2</sub>                        | 103.1              | 79.6            | 103.1                  | 76.4            |
| Ni/Si                                   | 101.4              | 20.4            | 101.5                  | 23.6            |
| Ni 2 <i>p</i> <sub>3/2</sub>            | Binding Energy, eV | Content, rel. % | Binding Energy, eV     | Content, rel. % |
| Ni <sup>0</sup>                         | 851.8              | 3.1             | 849.9                  | 1.0             |
| NiO                                     | 853.0              | 19.7            | 850.6                  | 7.8             |
| Ni(OH) <sub>2</sub>                     | 855.9              | 42.6            | 854.3                  | 60.8            |
| Ni <sup>2+</sup>                        | 857.5              | 34.6            | 856.7                  | 30.4            |
| Sample                                  | Pt/HNT             |                 | Pt/HNT-S <sub>16</sub> |                 |
| Si 2 <i>p</i>                           | Binding Energy, eV | Content, rel. % | Binding Energy, eV     | Content, rel. % |
| SiO <sub>2</sub>                        | 103.1              | 73.7            | 103.4                  | 69.3            |
| Pt/Si                                   | 101.7              | 26.3            | 102.0                  | 30.7            |
| Pt 4 <i>f</i> <sub>7/2</sub>            | Binding Energy, eV | Content, rel. % | Binding Energy, eV     | Content, rel. % |
| Pt <sup>0</sup>                         | 71.8               | 64.6            | 70.6                   | 68.7            |
| Pt/Si                                   | 73.1               | 35.4            | 72.0                   | 31.3            |
| Pt 4 <i>d</i> <sub>5/2</sub>            | Binding Energy, eV | Content, rel. % | Binding Energy, eV     | Content, rel. % |
| Pt <sup>0</sup>                         | 315.7              | 54.4            | 315.0                  | 68.5            |
| Pt/Si                                   | 318.7              | 38.1            | 318.2                  | 24.5            |
| Pt <sup>4+</sup>                        | 322.6              | 7.5             | 322.2                  | 7.0             |
